# Supplementary material
Source: Research Square preprint supplement (doi:10.21203/rs.3.rs-9687276/v1)
Supplement: Supplementary file 1 [file b26a53cf944b2bc50c05c26a.docx]

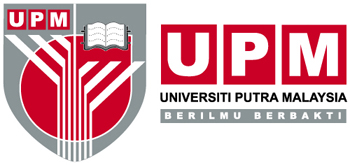
 **Associate Professor：**Prof. Madya Ts. Dr. Sreetheran Maruthaveeran

**Universiti Putra Malaysia**

**E-mail:** sreetheran@upm.edu.my

**Highlights**

**Dear Editor**：

• Social media data were used to analyze recreational activities on urban greenways.

• A total of 2,902 Dianping reviews from three Shenzhen greenways were examined.

• LDA–Gibbs topic modeling and NVivo analysis identified key influencing factors.

• Recreational physical activity was shaped by both social and environmental attributes.

• Seasonal and daily variations in greenway usage patterns were revealed.


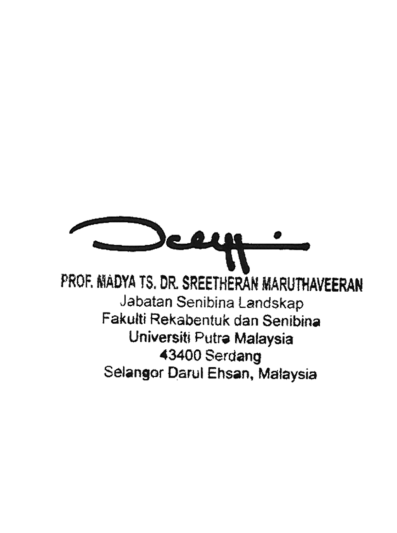


12/5/2026
